# Supplementary material
Source: HighWire-hosted journal article supplement (http://www.cmaj.ca/highwire/filestream/59905/field_highwire_adjunct_files/0/150672-com-1-at.pdf)
Supplement: 150672-com-1-at.pdf [file 150672-com-1-at.pdf]

**Appendix 1 (as supplied by the authors):** Comparing universal and directed stool donor models for fecal microbiota transplantation

|               | Universal Donor                                                                                                                                                                                                                                                                                                                                     | Directed Donor                                                                                                                                                                                                                                                                                                                                                                                                                                 |
|---------------|-----------------------------------------------------------------------------------------------------------------------------------------------------------------------------------------------------------------------------------------------------------------------------------------------------------------------------------------------------|------------------------------------------------------------------------------------------------------------------------------------------------------------------------------------------------------------------------------------------------------------------------------------------------------------------------------------------------------------------------------------------------------------------------------------------------|
| <b>Safety</b> | <ul style="list-style-type: none"> <li>▪ Standardized, comprehensive screening</li> <li>▪ Accounts for seroconversion delay</li> <li>▪ Centralized adverse events reporting and auditing</li> <li>▪ Without monitoring: risk of donor transmitting disease to many patients</li> <li>▪ With monitoring: donors de-risked by each success</li> </ul> | <ul style="list-style-type: none"> <li>▪ Screening variability between providers</li> <li>▪ Potentially less comprehensive screening</li> <li>▪ Voluntary adverse events reporting, challenging circumstances for audits</li> <li>▪ Without monitoring: risk of donor transmitting disease is contained to a small patient population</li> <li>▪ With monitoring: similar possibility of disease transmission as without monitoring</li> </ul> |
| <b>Access</b> | <ul style="list-style-type: none"> <li>▪ Physician needs no time or expertise to locate and screen qualified donors</li> <li>▪ No time needed for material preparation</li> <li>▪ No delay in patient care</li> <li>▪ Enables broad patient access</li> </ul>                                                                                       | <ul style="list-style-type: none"> <li>▪ Physician needs significant time and expertise to locate and screen qualified donors</li> <li>▪ Significant time needed for material preparation</li> <li>▪ Potential delay in patient care</li> <li>▪ Limited to academic centers</li> </ul>                                                                                                                                                         |
| <b>Cost</b>   | <ul style="list-style-type: none"> <li>▪ Small, predictable costs to obtain donor material</li> </ul>                                                                                                                                                                                                                                               | <ul style="list-style-type: none"> <li>▪ Higher, unpredictable costs to obtain donor material</li> </ul>                                                                                                                                                                                                                                                                                                                                       |
